# Supplementary material
Source: publisher site journal article supplement (https://www.dovepress.com/article/445378)
Supplement: Supplementary file 1 [file get_supplementary_file.php]

**Supplement Table 1** Categorical variables and variable assignments

| Variables | Assignment form |
| --- | --- |
| Marital status | Married=0, Unmarried and others=1 |
| Weekly nut intake | No=0, Yes=1 |
| Frequency of blood pressure measurement | Weekly=0, Monthly=1, Irregularly=2 |
| Death situation | No death=0, Death=1. |
